# Supplementary material for: A mechanistic study on the thermal unfolding of cytochrome c in presence of 4-chlorobutan-1-ol: Differential scanning calorimetric and spectroscopic approachElectronic supplementary information (ESI) available: Tables and figures. See http://www.rsc.org/suppdata/cp/b3/b311845b/
Source: Royal Society of Chemistry journal article supplement (doi:10.1039/b311845b), 2003-01-01
Supplement: b311845b-figures.pdf [file b311845b-figures.pdf]

**Figures for supporting information:**

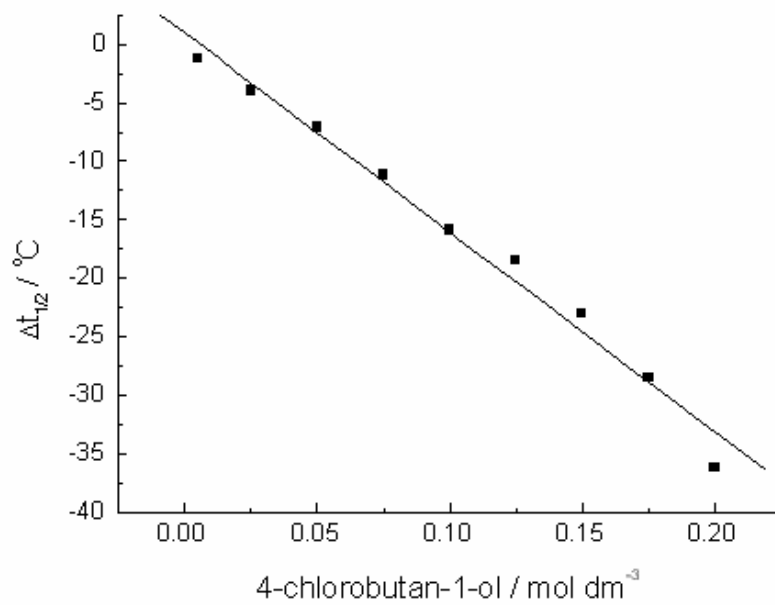

**FigureS1**

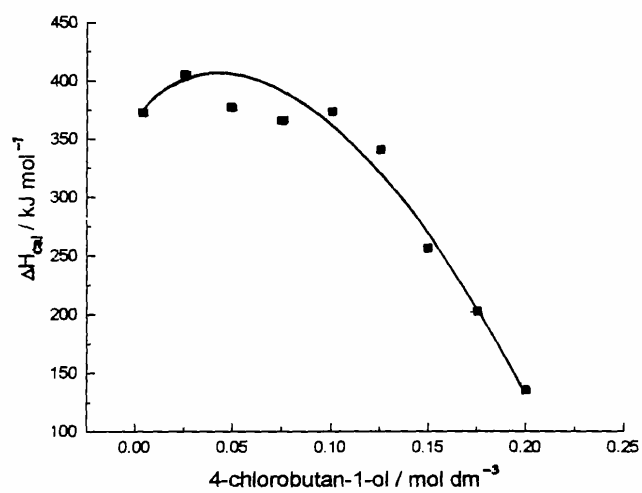

Figure S2

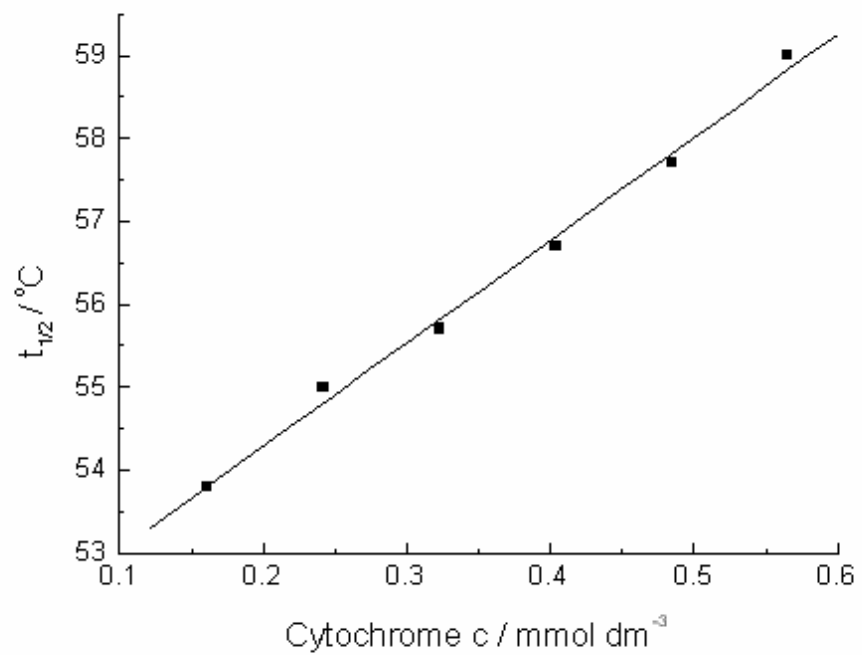

**Figure S3**

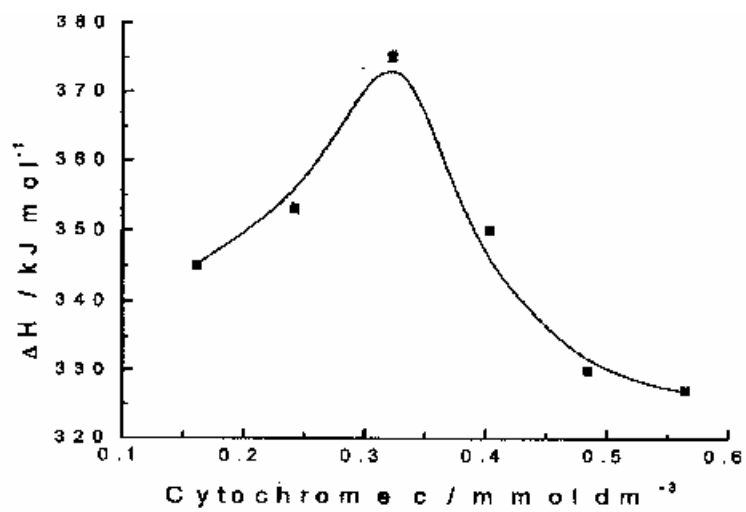

Figure S4

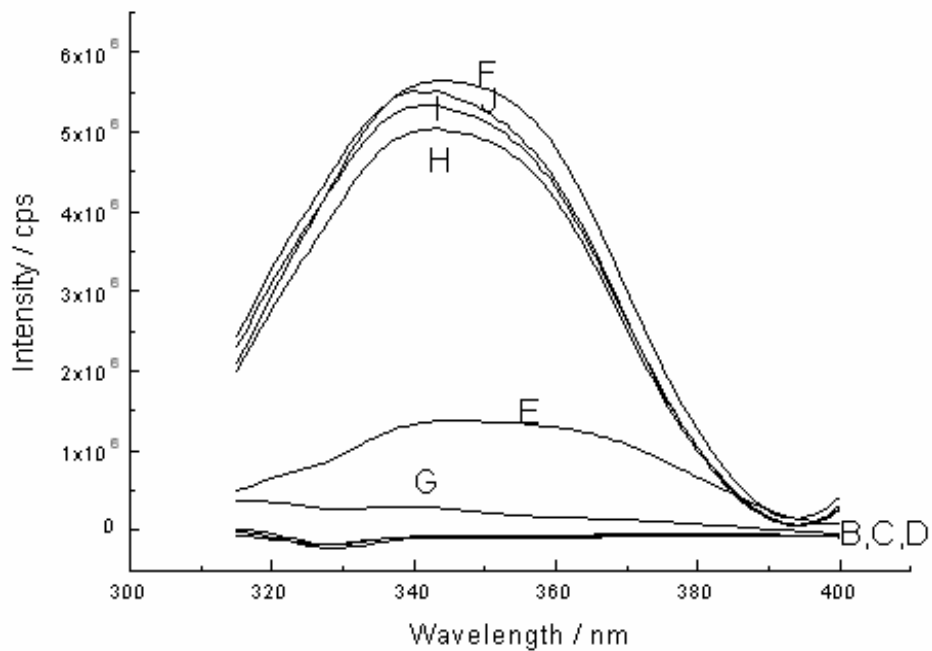

Figure S5

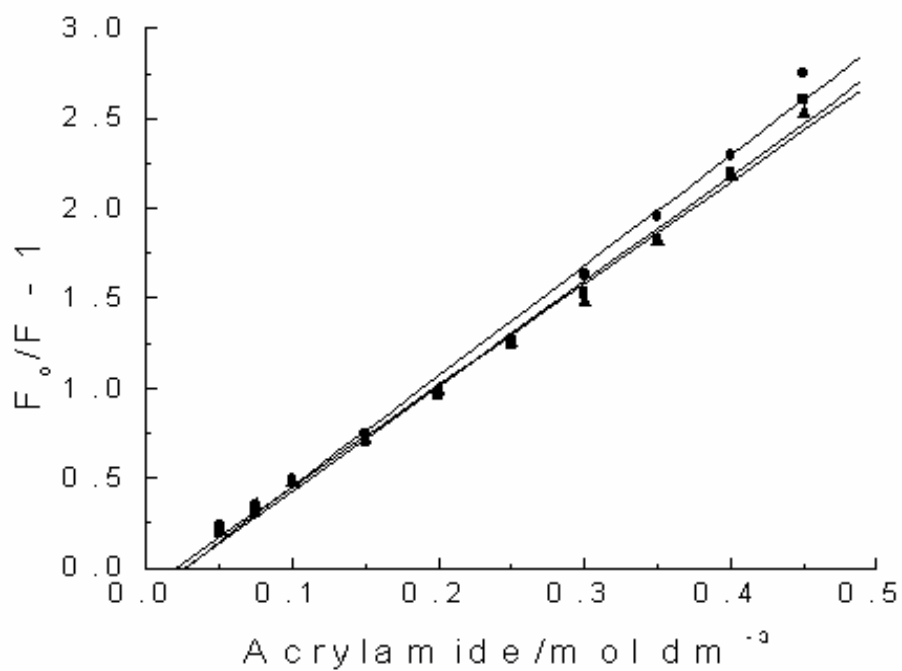

**Figure S6**

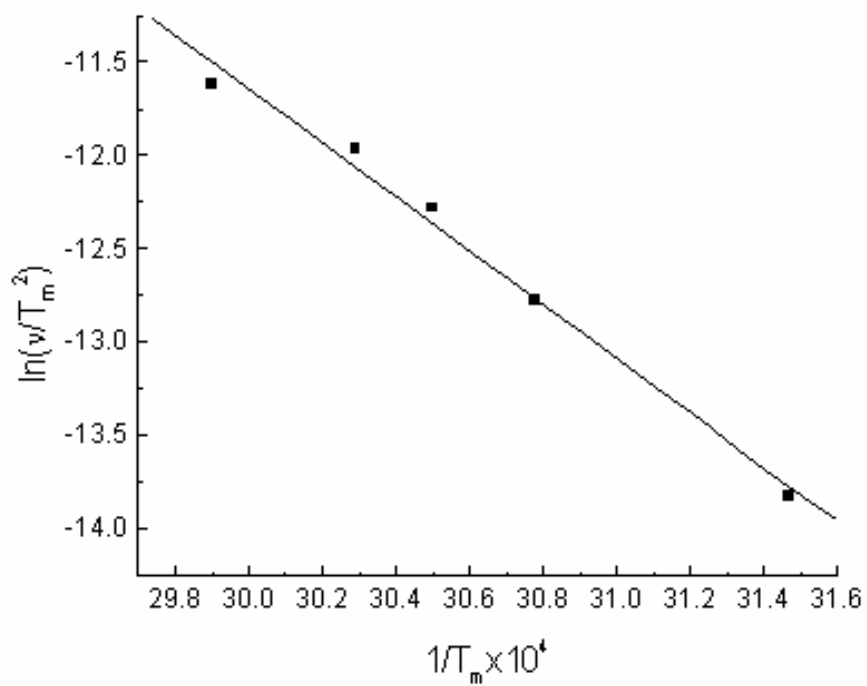

**Figure S7**

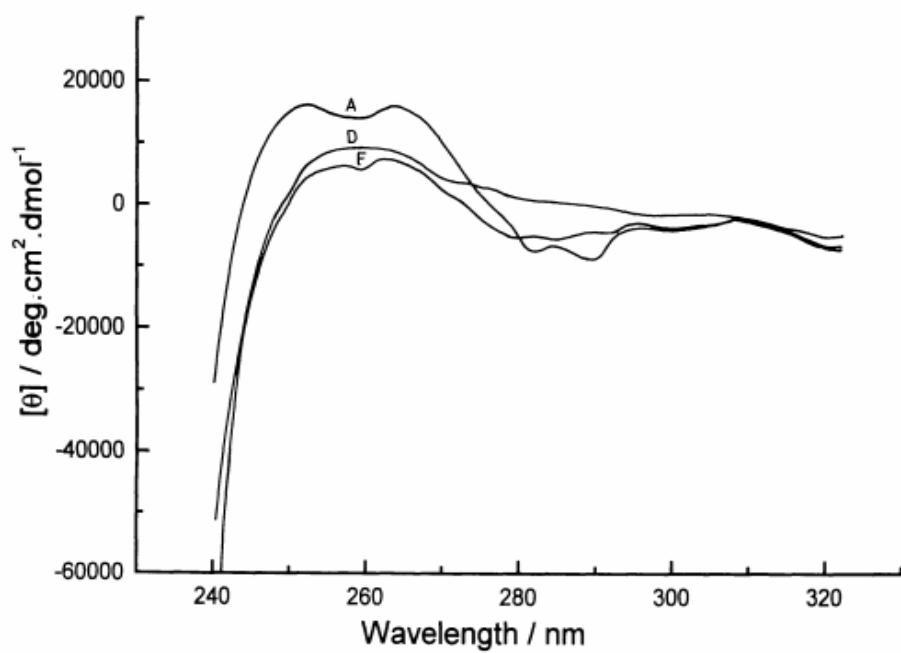

Figure S8



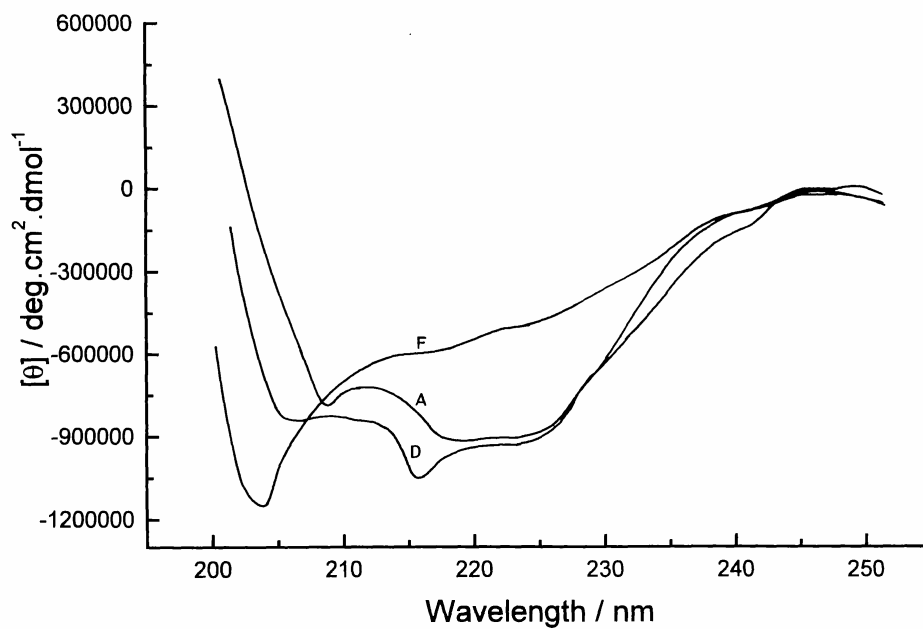

Figure S9

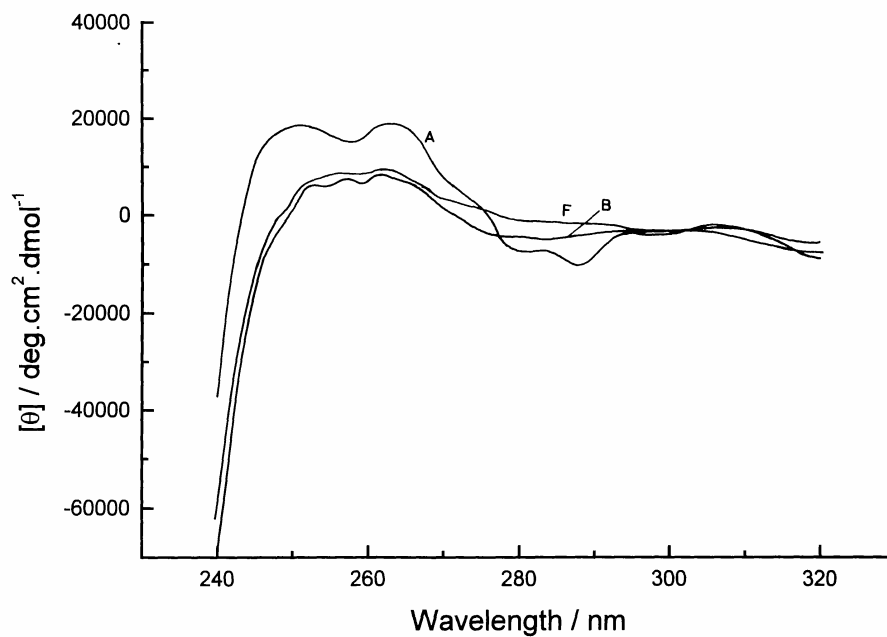

Figure S10

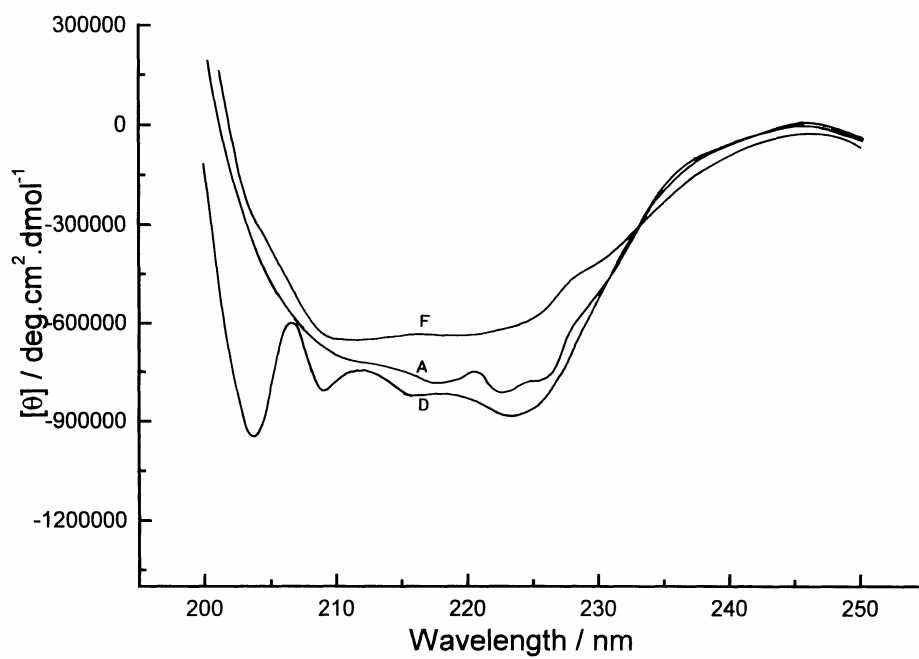

Figure S11

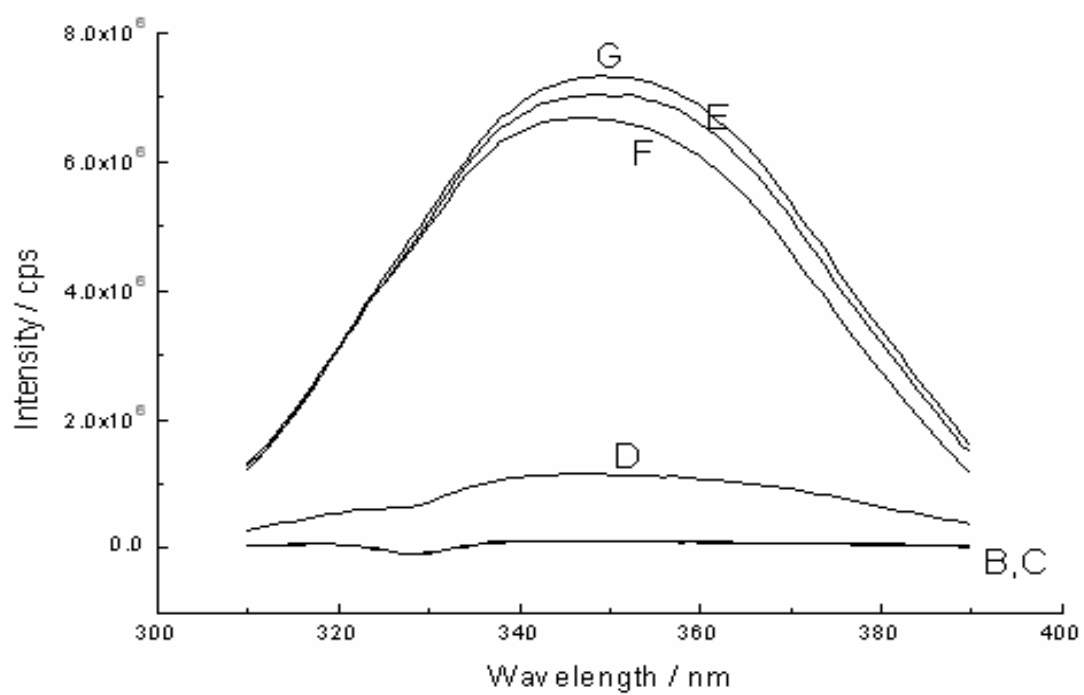

Figure 12

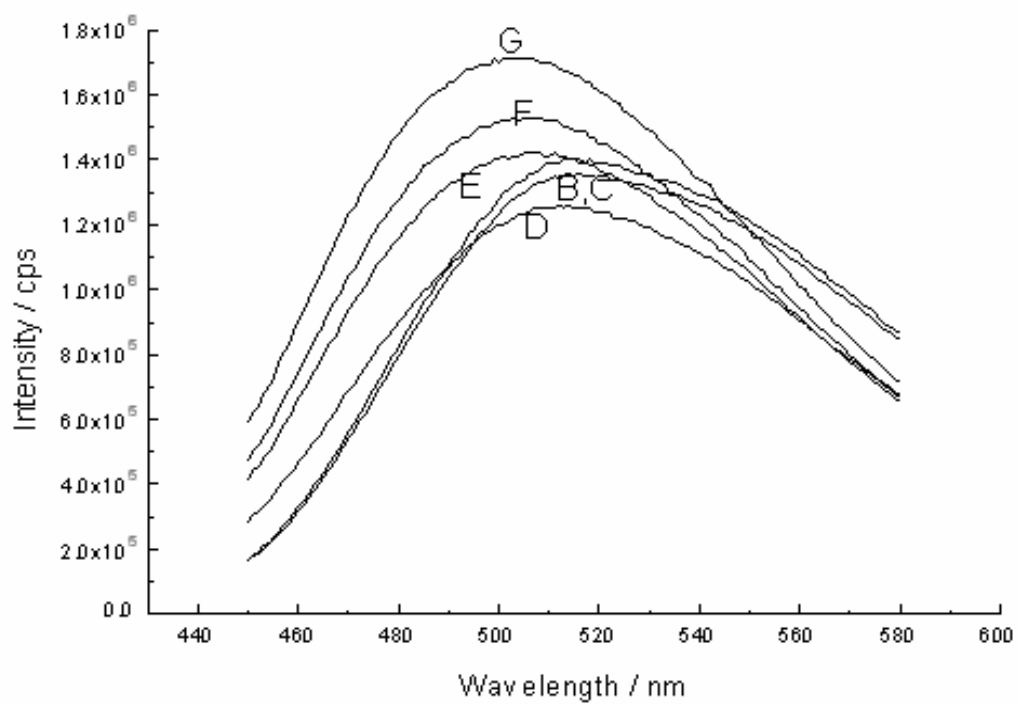

Figure S13

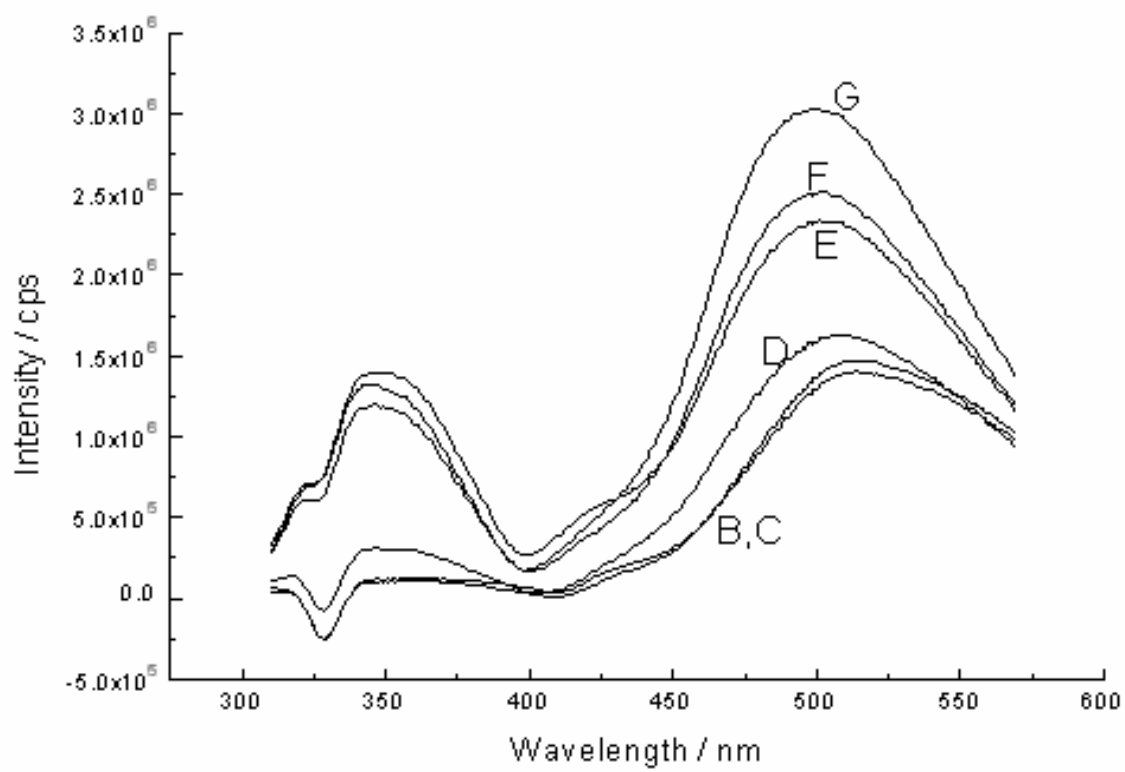

Figure S14

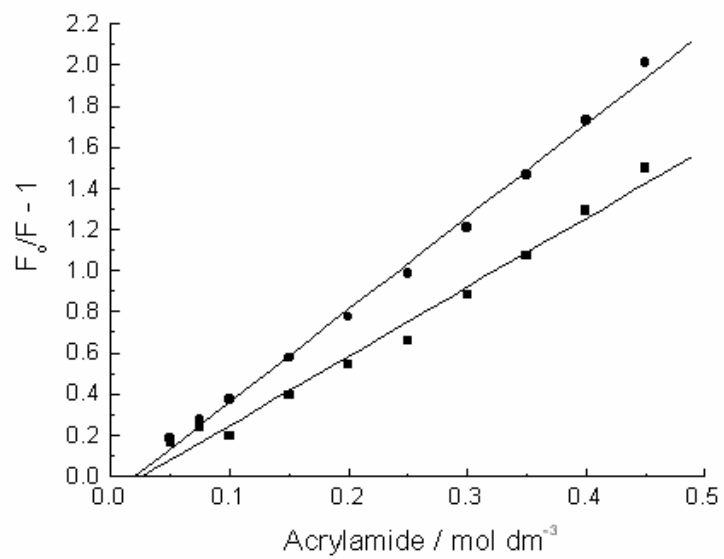

**Figure S15**
