# Supplementary material for: A mechanistic study on the thermal unfolding of cytochrome c in presence of 4-chlorobutan-1-ol: Differential scanning calorimetric and spectroscopic approachElectronic supplementary information (ESI) available: Tables and figures. See http://www.rsc.org/suppdata/cp/b3/b311845b/
Source: Royal Society of Chemistry journal article supplement (doi:10.1039/b311845b), 2003-01-01
Supplement: b311845b-tables.pdf [file b311845b-tables.pdf]

## Tables and figure captions

**Table S1.**

Thermodynamic parameters of thermal unfolding of  $0.32 \times 10^{-3} \text{ mol dm}^{-3}$  cytochrome c in presence of 4-chlorobutan-1-ol at different pH (Scan Rate  $0.5 \text{ K min}^{-1}$ ).

| Alcohol <sup>†</sup> | $t_{1/2}/^{\circ}\text{C}$  | $\Delta H_{\text{cal}}$<br>( $\text{kJ.mol}^{-1}$ ) | $\Delta C_p$<br>( $\text{kJ.K}^{-1}.\text{mol}^{-1}$ ) | $\Delta S$<br>( $\text{kJ.K}^{-1}.\text{mol}^{-1}$ ) | $\beta$<br>( $\Delta H_{\text{VH}}/\Delta H_{\text{cal}}$ ) | $\sigma^*$ |
|----------------------|-----------------------------|-----------------------------------------------------|--------------------------------------------------------|------------------------------------------------------|-------------------------------------------------------------|------------|
| <b>pH=4.0</b>        |                             |                                                     |                                                        |                                                      |                                                             |            |
| 0                    | 71.6                        | 360                                                 | 7.4                                                    | 0.92                                                 | 0.97                                                        | 0.839      |
| 0                    | 71.6                        | 352                                                 | 7.1                                                    | 1.02                                                 | 1.02                                                        | 0.583      |
| 0                    | 71.7                        | 369                                                 | 6.9                                                    | 1.07                                                 | 0.98                                                        | 0.982      |
| 0                    | 71.8                        | 362                                                 | 6.1                                                    | 1.05                                                 | 1.04                                                        | 0.846      |
| <b>Average</b>       | <b>71.6</b>                 | <b>360</b>                                          | <b>6.9</b>                                             | <b>1.05</b>                                          | <b>1.00</b>                                                 |            |
|                      | <b><math>\pm 0.1</math></b> | <b><math>\pm 7.0</math></b>                         | <b><math>\pm 0.6</math></b>                            | <b><math>\pm 0.07</math></b>                         | <b><math>\pm 0.03</math></b>                                |            |
| 5                    | 70.9                        | 391                                                 | 5.3                                                    | 1.00                                                 | 1.03                                                        | 0.535      |
| 5                    | 70.1                        | 381                                                 | 4.4                                                    | 1.11                                                 | 1.00                                                        | 0.835      |
| 5                    | 70.2                        | 391                                                 | 5.4                                                    | 1.14                                                 | 1.00                                                        | 0.901      |
| <b>Average</b>       | <b>70.4</b>                 | <b>387</b>                                          | <b>5.0</b>                                             | <b>1.13</b>                                          | <b>1.01</b>                                                 |            |
|                      | <b><math>\pm 0.4</math></b> | <b><math>\pm 6.0</math></b>                         | <b><math>\pm 0.6</math></b>                            | <b><math>\pm 0.07</math></b>                         | <b><math>\pm 0.02</math></b>                                |            |
| 25 <sup>a</sup>      | 67.7                        | 412                                                 | 5.3                                                    | 1.21                                                 | 0.98                                                        | 1.450      |
| 25 <sup>a</sup>      | 67.6                        | 404                                                 | 4.4                                                    | 1.19                                                 | 1.00                                                        | 1.390      |
| 25 <sup>a</sup>      | 67.5                        | 406                                                 | 5.4                                                    | 1.19                                                 | 1.06                                                        | 0.845      |
| <b>Average</b>       | <b>67.6</b>                 | <b>407</b>                                          | <b>5.3</b>                                             | <b>1.20</b>                                          | <b>1.01</b>                                                 |            |
|                      | <b><math>\pm 0.1</math></b> | <b><math>\pm 4.0</math></b>                         | <b><math>\pm 0.1</math></b>                            | <b><math>\pm 0.01</math></b>                         | <b><math>\pm 0.04</math></b>                                |            |
| 50 <sup>a</sup>      | 64.9                        | 372                                                 | 6.3                                                    | -                                                    | -                                                           | 0.875      |
| 50 <sup>a</sup>      | 64.4                        | 379                                                 | 8.1                                                    | -                                                    | -                                                           | 0.731      |
| 50 <sup>a</sup>      | 64.2                        | 380                                                 | 7.2                                                    | -                                                    | -                                                           | 0.754      |
| <b>Average</b>       | <b>64.5</b>                 | <b>377</b>                                          | <b>7.2</b>                                             |                                                      |                                                             |            |
|                      | <b><math>\pm 0.4</math></b> | <b><math>\pm 4.0</math></b>                         | <b><math>\pm 0.9</math></b>                            |                                                      |                                                             |            |
| 75                   | 60.6                        | 364                                                 | 5.9                                                    | -                                                    | -                                                           | 1.490      |
| 75                   | 60.5                        | 367                                                 | 3.1                                                    | -                                                    | -                                                           | 1.460      |
| 75                   | 60.1                        | 370                                                 | 4.5                                                    | -                                                    | -                                                           | 0.868      |
| <b>Average</b>       | <b>60.4</b>                 | <b>367</b>                                          | <b>4.5</b>                                             |                                                      |                                                             |            |
|                      | <b><math>\pm 0.3</math></b> | <b><math>\pm 3.0</math></b>                         | <b><math>\pm 1.4</math></b>                            |                                                      |                                                             |            |

| Alcohol <sup>†</sup> | $t_{1/2}/^{\circ}\text{C}$ | $\Delta H_{\text{cal}}$<br>(kJ.mol <sup>-1</sup> ) | $\Delta C_P$<br>(kJ.K <sup>-1</sup> .mol <sup>-1</sup> ) | $\Delta S$<br>(kJ.K <sup>-1</sup> .mol <sup>-1</sup> ) | $\sigma^*$ |
|----------------------|----------------------------|----------------------------------------------------|----------------------------------------------------------|--------------------------------------------------------|------------|
| 100                  | 55.7                       | 372                                                | 6.5                                                      | -                                                      | 0.872      |
| 100                  | 55.7                       | 378                                                | 9.7                                                      | -                                                      | 1.120      |
| 100                  | 55.6                       | 373                                                | 8.1                                                      | -                                                      | 0.882      |
| 100                  | 55.7                       | 376                                                | 6.0                                                      | -                                                      | 0.876      |
| <b>Average</b>       | <b>55.7</b><br><b>±0.1</b> | <b>375</b><br><b>±3.0</b>                          | <b>7.6</b><br><b>±1.7</b>                                |                                                        |            |
| 125                  | 53.2                       | 348                                                | 5.8                                                      | -                                                      | 0.885      |
| 125                  | 53.1                       | 337                                                | 4.8                                                      | -                                                      | 0.842      |
| 125                  | 53.2                       | 343                                                | 6.0                                                      | -                                                      | 0.776      |
| <b>Average</b>       | <b>53.1</b><br><b>±0.1</b> | <b>343</b><br><b>±6.0</b>                          | <b>5.5</b><br><b>±0.6</b>                                |                                                        |            |
| 150                  | 48.3                       | 265                                                | 5.8                                                      | -                                                      | 1.060      |
| 150                  | 48.6                       | 259                                                | 4.0                                                      | -                                                      | 0.738      |
| 150                  | 48.5                       | 263                                                | 4.5                                                      | -                                                      | 0.952      |
| <b>Average</b>       | <b>48.5</b><br><b>±0.2</b> | <b>262</b><br><b>±3.0</b>                          | <b>4.8</b><br><b>±0.9</b>                                |                                                        |            |
| 175                  | 42.9                       | 206                                                | 3.6                                                      | -                                                      | 0.663      |
| 175                  | 43.4                       | 203                                                | 3.9                                                      | -                                                      | 0.724      |
| 175                  | 43.0                       | 215                                                | 3.1                                                      | -                                                      | 0.697      |
| <b>Average</b>       | <b>43.1</b><br><b>±0.3</b> | <b>208</b><br><b>±6.0</b>                          | <b>3.5</b><br><b>±0.4</b>                                |                                                        |            |
| 200                  | 35.3                       | 134                                                | 3.6                                                      | -                                                      | 0.449      |
| 200                  | 36.0                       | 143                                                | 4.0                                                      | -                                                      | 0.398      |
| 200                  | 35.0                       | 137                                                | 3.8                                                      | -                                                      | 0.441      |
| <b>Average</b>       | <b>35.4</b><br><b>±0.5</b> | <b>138</b><br><b>±5.0</b>                          | <b>3.8</b><br><b>±0.20</b>                               |                                                        |            |
| <b>pH=6.0</b>        |                            |                                                    |                                                          |                                                        |            |
| 25                   | 71.7                       | 359                                                | 7.6                                                      | -                                                      | 1.130      |
| 25                   | 71.2                       | 360                                                | 4.5                                                      | -                                                      | 0.977      |
| 25                   | 71.4                       | 367                                                | 6.1                                                      | -                                                      | 0.956      |
| <b>Average</b>       | <b>71.4</b><br><b>±0.3</b> | <b>362</b><br><b>±4.0</b>                          | <b>6.1</b><br><b>±1.6</b>                                |                                                        |            |

| Alcohol <sup>†</sup> | $t_{1/2}/^{\circ}\text{C}$ | $\Delta H_{\text{cal}}$<br>(kJ.mol <sup>-1</sup> ) | $\Delta C_p$<br>(kJ.K <sup>-1</sup> .mol <sup>-1</sup> ) | $\Delta S$<br>(kJ.K <sup>-1</sup> .mol <sup>-1</sup> ) | $\sigma^*$ |
|----------------------|----------------------------|----------------------------------------------------|----------------------------------------------------------|--------------------------------------------------------|------------|
| 50                   | 62.2                       | 331                                                | 4.7                                                      | -                                                      | 1.680      |
| 50                   | 61.8                       | 335                                                | 4.9                                                      | -                                                      | 1.430      |
| 50                   | 61.8                       | 331                                                | 5.7                                                      | -                                                      | 1.470      |
| <b>Average</b>       | <b>61.9</b><br><b>±0.3</b> | <b>332</b><br><b>±0.2</b>                          | <b>5.1</b><br><b>±0.5</b>                                |                                                        |            |
| 75                   | 54.5                       | 225                                                | 6.5                                                      | -                                                      | 0.665      |
| 75                   | 54.9                       | 232                                                | 7.1                                                      | -                                                      | 1.220      |
| 75                   | 54.8                       | 220                                                | 4.7                                                      | -                                                      | 0.949      |
| <b>Average</b>       | <b>54.7</b><br><b>±0.2</b> | <b>225</b><br><b>±6.0</b>                          | <b>6.1</b><br><b>±1.2</b>                                |                                                        |            |
| 100                  | 48.6                       | 204                                                | 4.2                                                      | -                                                      | 0.647      |
| 100                  | 48.6                       | 196                                                | 5.1                                                      | -                                                      | 0.757      |
| 100                  | 48.8                       | 199                                                | 6.0                                                      | -                                                      | 0.704      |
| <b>Average</b>       | <b>48.7</b><br><b>±0.1</b> | <b>200</b><br><b>±4.0</b>                          | <b>5.1</b><br><b>±0.9</b>                                |                                                        |            |
| 125                  | 41.4                       | 112                                                | 5.7                                                      | -                                                      | 0.410      |
| 125                  | 41.0                       | 109                                                | 4.6                                                      | -                                                      | 0.256      |
| 125                  | 41.8                       | 115                                                | 5.2                                                      | -                                                      | 0.463      |
| <b>Average</b>       | <b>41.4</b><br><b>±0.4</b> | <b>112</b><br><b>±3.0</b>                          | <b>5.2</b><br><b>±0.6</b>                                |                                                        |            |
| <b>pH=7.0</b>        |                            |                                                    |                                                          |                                                        |            |
| 25                   | 73.9                       | 356                                                | 1.8                                                      | -                                                      | 2.970      |
| 25                   | 73.8                       | 348                                                | 1.6                                                      | -                                                      | 3.030      |
| 25                   | 73.7                       | 354                                                | 3.8                                                      | -                                                      | 2.280      |
| 25                   | 73.5                       | 339                                                | 1.8                                                      | -                                                      | 2.390      |
| <b>Average</b>       | <b>±0.2</b>                | <b>349</b><br><b>±8.0</b>                          | <b>2.3</b><br><b>±1.0</b>                                |                                                        |            |
| 50                   | 64.8                       | 336                                                | 8.9                                                      | -                                                      | 0.886      |
| 50                   | 64.5                       | 334                                                | 4.9                                                      | -                                                      | 0.999      |
| 50                   | 64.7                       | 353                                                | 7.7                                                      | -                                                      | 0.771      |
| <b>Average</b>       | <b>64.7</b><br><b>±0.2</b> | <b>341</b><br><b>±10.0</b>                         | <b>7.2</b><br><b>±2.1</b>                                |                                                        |            |

| Alcohol <sup>†</sup> | $t_{1/2}/^{\circ}\text{C}$ | $\Delta H_{\text{cal}}$<br>(kJ.mol <sup>-1</sup> ) | $\Delta C_p$<br>(kJ.K <sup>-1</sup> .mol <sup>-1</sup> ) | $\Delta S$<br>(kJ.K <sup>-1</sup> .mol <sup>-1</sup> ) | $\sigma^*$ |
|----------------------|----------------------------|----------------------------------------------------|----------------------------------------------------------|--------------------------------------------------------|------------|
| 75                   | 58.6                       | 314                                                | 4.6                                                      | -                                                      | 1.510      |
| 75                   | 58.0                       | 311                                                | 4.8                                                      | -                                                      | 1.530      |
| 75                   | 58.4                       | 305                                                | 5.4                                                      | -                                                      | 1.460      |
| <b>Average</b>       | <b>58.3</b><br><b>±0.3</b> | <b>310</b><br><b>±5.0</b>                          | <b>4.9</b><br><b>±0.40</b>                               |                                                        |            |
| 100                  | 52.4                       | 256                                                | 5.2                                                      | -                                                      | 0.986      |
| 100                  | 52.1                       | 244                                                | 4.4                                                      | -                                                      | 0.937      |
| 100                  | 51.9                       | 245                                                | 1.9                                                      | -                                                      | 0.950      |
| <b>Average</b>       | <b>52.1</b><br><b>±0.3</b> | <b>248</b><br><b>±7.0</b>                          | <b>3.8</b><br><b>±1.7</b>                                |                                                        |            |
| 125                  | 43.1                       | 181                                                | 2.4                                                      | -                                                      | 0.479      |
| 125                  | 43.6                       | 177                                                | 3.2                                                      | -                                                      | 0.457      |
| 125                  | 43.4                       | 177                                                | 3.9                                                      | -                                                      | 0.387      |
| <b>Average</b>       | <b>43.4</b><br><b>±0.3</b> | <b>178</b><br><b>±2.0</b>                          | <b>3.2</b><br><b>±0.8</b>                                |                                                        |            |
| 150                  | 35.9                       | 156                                                | 4.0                                                      | -                                                      | 0.379      |
| 150                  | 35.5                       | 144                                                | 3.8                                                      | -                                                      | 0.347      |
| 150                  | 36.0                       | 152                                                | 2.3                                                      | -                                                      | 0.383      |
| <b>Average</b>       | <b>35.8</b><br><b>±0.3</b> | <b>151</b><br><b>±0.6</b>                          | <b>3.4</b><br><b>±0.9</b>                                | -                                                      |            |

a  $\sigma$  is standard deviation of the fit in kJ.K<sup>-1</sup>.mol<sup>-1</sup>

<sup>†</sup> The concentration of alcohol and protein is in 10<sup>-3</sup> mol dm<sup>-3</sup>

**Table S2.**

**Thermodynamic parameters of unfolding of  $0.32 \times 10^{-3} \text{ mol dm}^{-3}$  cytochrome c in presence of 4-chlorobutan-1-ol at different pH (Scan rate dependence)**

| Scan Rate<br>(K min <sup>-1</sup> ) | Alcohol <sup>†</sup> | $t_{1/2}/^{\circ}\text{C}$ | $\Delta H_{\text{cal}}$<br>(kJ.mol <sup>-1</sup> ) | $\Delta C_p$<br>(kJ.K <sup>-1</sup> .mol <sup>-1</sup> ) | $\sigma^*$ |
|-------------------------------------|----------------------|----------------------------|----------------------------------------------------|----------------------------------------------------------|------------|
| <b>pH=4.0</b>                       |                      |                            |                                                    |                                                          |            |
| 0.1                                 | 100                  | 46.9                       | 252                                                | 5.4                                                      | 1.47       |
| 0.1                                 | 100                  | 46.3                       | 249                                                | 3.9                                                      | 1.54       |
| 0.1                                 | 100                  | 46.3                       | 248                                                | 3.9                                                      | 1.11       |
| <b>Average</b>                      | <b>100</b>           | <b>46.5</b>                | <b>250</b>                                         | <b>4.4</b>                                               |            |
|                                     | <b>100</b>           | <b>±0.3</b>                | <b>±2.0</b>                                        | <b>±0.9</b>                                              |            |
| 0.3                                 | 100                  | 53.6                       | 318                                                | 3.6                                                      | 0.688      |
| 0.3                                 | 100                  | 53.9                       | 330                                                | 5.1                                                      | 0.455      |
| 0.3                                 | 100                  | 54.0                       | 318                                                | 3.7                                                      | 0.681      |
| <b>Average</b>                      | <b>100</b>           | <b>53.8</b>                | <b>322</b>                                         | <b>4.1</b>                                               |            |
|                                     |                      | <b>±0.2</b>                | <b>±7.0</b>                                        | <b>±0.8</b>                                              |            |
| 0.5                                 | 100                  | 55.7                       | 372                                                | 6.5                                                      | 0.872      |
| 0.5                                 | 100                  | 55.7                       | 378                                                | 7.0                                                      | 1.120      |
| 0.5                                 | 100                  | 55.6                       | 373                                                | 8.1                                                      | 0.882      |
| 0.5                                 | 100                  | 55.7                       | 376                                                | 6.0                                                      | 0.876      |
| <b>Average</b>                      | <b>100</b>           | <b>55.7</b>                | <b>375</b>                                         | <b>6.9</b>                                               |            |
|                                     |                      | <b>±0.1</b>                | <b>±3.0</b>                                        | <b>±0.9</b>                                              |            |
| 0.7                                 | 100                  | 58.8                       | 330                                                | 7.4                                                      | 0.561      |
| 0.7                                 | 100                  | 58.7                       | 329                                                | 7.2                                                      | 0.532      |
| 0.7                                 | 100                  | 58.5                       | 327                                                | 7.1                                                      | 0.520      |
| <b>Average</b>                      | <b>100</b>           | <b>58.7</b>                | <b>329</b>                                         | <b>7.2</b>                                               |            |
|                                     |                      | <b>±0.2</b>                | <b>±2.0</b>                                        | <b>±0.2</b>                                              |            |
| 1.0                                 | 100                  | 61.0                       | 303                                                | 6.4                                                      | 0.866      |
| 1.0                                 | 100                  | 60.8                       | 292                                                | 6.6                                                      | 0.923      |
| 1.0                                 | 100                  | 61.7                       | 305                                                | 4.0                                                      | 0.332      |
| <b>Average</b>                      | <b>100</b>           | <b>61.2</b>                | <b>300</b>                                         | <b>5.7</b>                                               |            |
|                                     |                      | <b>±0.5</b>                | <b>±7.0</b>                                        | <b>±1.4</b>                                              |            |
| <b>pH=6.0</b>                       |                      |                            |                                                    |                                                          |            |
| 0.1                                 | 75                   | 44.4                       | 168                                                | 8.1                                                      | 0.700      |
| 0.1                                 | 75                   | 44.7                       | 181                                                | 6.4                                                      | 0.884      |
| 0.1                                 | 75                   | 44.8                       | 178                                                | 7.3                                                      | 0.658      |
| <b>Average</b>                      | <b>75</b>            | <b>44.6</b>                | <b>175</b>                                         | <b>7.3</b>                                               |            |
|                                     |                      | <b>±0.1</b>                | <b>±7.0</b>                                        | <b>±0.9</b>                                              |            |

| Scan Rate<br>(K min <sup>-1</sup> ) | Alcohol <sup>†</sup> | t <sub>1/2</sub> /°C       | ΔH <sub>cal</sub><br>(kJ.mol <sup>-1</sup> ) | ΔC <sub>p</sub><br>(kJ.K <sup>-1</sup> .mol <sup>-1</sup> ) | σ*    |
|-------------------------------------|----------------------|----------------------------|----------------------------------------------|-------------------------------------------------------------|-------|
| 0.3                                 | 75                   | 51.4                       | 202                                          | 3.7                                                         | 0.859 |
| 0.3                                 | 75                   | 51.8                       | 204                                          | 4.1                                                         | 0.823 |
| 0.3                                 | 75                   | 52.0                       | 200                                          | 5.9                                                         | 1.090 |
| <b>Average</b>                      | <b>75</b>            | <b>51.7</b><br><b>±0.3</b> | <b>202</b><br><b>±2.0</b>                    | <b>4.6</b><br><b>±1.2</b>                                   |       |
| 0.5                                 | 75                   | 54.5                       | 225                                          | 6.5                                                         | 0.665 |
| 0.5                                 | 75                   | 54.9                       | 230                                          | 7.1                                                         | 1.220 |
| 0.5                                 | 75                   | 54.8                       | 220                                          | 4.7                                                         | 0.949 |
| <b>Average</b>                      | <b>75</b>            | <b>54.7</b><br><b>±0.2</b> | <b>225</b><br><b>±5.0</b>                    | <b>6.1</b><br><b>±1.2</b>                                   |       |
| 0.7                                 | 75                   | 57.1                       | 246                                          | 3.8                                                         | 0.733 |
| 0.7                                 | 75                   | 56.8                       | 250                                          | 3.2                                                         | 0.753 |
| 0.7                                 | 75                   | 57.1                       | 254                                          | 4.9                                                         | 0.547 |
| <b>Average</b>                      | <b>75</b>            | <b>57.0</b><br><b>±0.2</b> | <b>250</b><br><b>±4.0</b>                    | <b>4.0</b><br><b>±0.9</b>                                   |       |
| 1.0                                 | 75                   | 61.1                       | 277                                          | 4.2                                                         | 0.764 |
| 1.0                                 | 75                   | 61.5                       | 275                                          | 4.8                                                         | 1.200 |
| 1.0                                 | 75                   | 61.2                       | 275                                          | 4.3                                                         | 1.080 |
| 1.0                                 | 75                   | 61.2                       | 285                                          | 3.2                                                         | 0.963 |
| <b>Average</b>                      | <b>75</b>            | <b>61.3</b><br><b>±0.2</b> | <b>278</b><br><b>±5.0</b>                    | <b>4.1</b><br><b>±0.7</b>                                   |       |
| <b>pH=7.0</b>                       |                      |                            |                                              |                                                             |       |
| 0.1                                 | 100                  | 43.2                       | 170                                          | 4.3                                                         | 0.571 |
| 0.1                                 | 100                  | 42.8                       | 180                                          | 4.1                                                         | 0.702 |
| 0.1                                 | 100                  | 42.8                       | 181                                          | 3.9                                                         | 0.792 |
| <b>Average</b>                      | <b>100</b>           | <b>42.9</b><br><b>±0.2</b> | <b>177</b><br><b>±6.0</b>                    | <b>4.1</b><br><b>±0.2</b>                                   |       |
| 0.3                                 | 100                  | 49.0                       | 218                                          | 1.3                                                         | 0.569 |
| 0.3                                 | 100                  | 49.4                       | 233                                          | 3.2                                                         | 0.865 |
| 0.3                                 | 100                  | 49.4                       | 234                                          | 2.5                                                         | 0.742 |
| <b>Average</b>                      | <b>100</b>           | <b>49.3</b><br><b>±0.2</b> | <b>228</b><br><b>±9.0</b>                    | <b>2.3</b><br><b>±1.0</b>                                   |       |
| 0.5                                 | 100                  | 52.4                       | 256                                          | 5.2                                                         | 0.986 |
| 0.5                                 | 100                  | 52.1                       | 244                                          | 4.4                                                         | 0.937 |
| 0.5                                 | 100                  | 51.9                       | 245                                          | 4.8                                                         | 0.950 |

**Average**      **100**      **52.1**      **248**      **4.8**  
                         **±0.3**      **±7.0**      **±0.4**

| Scan Rate<br>(K min <sup>-1</sup> ) | Alcohol <sup>†</sup> | t <sub>1/2</sub> /°C       | ΔH <sub>cal</sub><br>(kJ.mol <sup>-1</sup> ) | ΔC <sub>p</sub><br>(kJ.K <sup>-1</sup> .mol <sup>-1</sup> ) | σ*    |
|-------------------------------------|----------------------|----------------------------|----------------------------------------------|-------------------------------------------------------------|-------|
| 0.7                                 | 100                  | 54.7                       | 276                                          | 1.3                                                         | 0.953 |
| 0.7                                 | 100                  | 54.8                       | 273                                          | 1.4                                                         | 0.959 |
| 0.7                                 | 100                  | 54.6                       | 270                                          | 0.4                                                         | 0.993 |
| <b>Average</b>                      | <b>100</b>           | <b>54.7</b><br><b>±0.1</b> | <b>273</b><br><b>±3.0</b>                    | <b>1.0</b><br><b>±0.6</b>                                   |       |
| 1.0                                 | 100                  | 56.7                       | 233                                          | 2.1                                                         | 0.893 |
| 1.0                                 | 100                  | 57.1                       | 239                                          | 0.6                                                         | 0.976 |
| 1.0                                 | 100                  | 56.7                       | 234                                          | 0.0                                                         | 1.010 |
| 1.0                                 | 100                  | 57.4                       | 229                                          | 2.2                                                         | 1.090 |
| <b>Average</b>                      | <b>100</b>           | <b>57.0</b><br><b>±0.3</b> | <b>234</b><br><b>±4.0</b>                    | <b>1.2</b><br><b>±1.1</b>                                   |       |

**Table S3.**

**Thermodynamic parameters of thermal unfolding of cytochrome c in presence of 4-chlorobutan-1-ol at different pH (Scan Rate 0.5 K min<sup>-1</sup>)**

| Protein <sup>†</sup> | Alcohol <sup>†</sup> | t <sub>1/2</sub> /°C       | ΔH <sub>cal</sub><br>(kJ.mol <sup>-1</sup> ) | ΔC <sub>p</sub><br>(kJ.K <sup>-1</sup> .mol <sup>-1</sup> ) | σ*                           |
|----------------------|----------------------|----------------------------|----------------------------------------------|-------------------------------------------------------------|------------------------------|
| <b>pH=4.0</b>        |                      |                            |                                              |                                                             |                              |
| 0.16                 | 100                  | 54.1                       | 352                                          | 6.9                                                         | 0.664                        |
| 0.16                 | 100                  | 53.6                       | 343                                          | 5.2                                                         | 0.601                        |
| 0.16                 | 100                  | 53.8                       | 341                                          | 7.3                                                         | 0.689                        |
| <b>Average</b>       | <b>100</b>           | <b>53.8</b><br><b>±0.3</b> | <b>345</b><br><b>±6.0</b>                    | <b>6.5</b><br><b>±1.2</b>                                   | <b>0.654</b><br><b>±0.02</b> |
| 0.24                 | 100                  | 55.1                       | 355                                          | 5.8                                                         | 0.700                        |
| 0.24                 | 100                  | 55.0                       | 356                                          | 3.6                                                         | 0.754                        |
| 0.24                 | 100                  | 55.0                       | 350                                          | 5.5                                                         | 0.687                        |
| <b>Average</b>       | <b>100</b>           | <b>55.0</b><br><b>±0.1</b> | <b>354</b><br><b>±3.0</b>                    | <b>4.9</b><br><b>1.2</b>                                    | <b>0.714</b>                 |
| 0.32                 | 100                  | 55.7                       | 372                                          | 6.5                                                         | 0.872                        |
| 0.32                 | 100                  | 55.7                       | 378                                          | 9.7                                                         | 1.120                        |
| 0.32                 | 100                  | 55.6                       | 373                                          | 8.1                                                         | 0.882                        |
| 0.32                 | 100                  | 55.7                       | 376                                          | 6.0                                                         | 0.876                        |
| <b>Average</b>       | <b>100</b>           | <b>55.7</b><br><b>±0.1</b> | <b>375</b><br><b>±3.0</b>                    | <b>7.6</b><br><b>±1.7</b>                                   | <b>0.913</b>                 |
| 0.40                 | 100                  | 56.6                       | 351                                          | 4.0                                                         | 0.809                        |
| 0.40                 | 100                  | 56.8                       | 356                                          | 5.8                                                         | 0.623                        |
| 0.40                 | 100                  | 56.8                       | 344                                          | 4.2                                                         | 0.834                        |
| <b>Average</b>       | <b>100</b>           | <b>56.7</b><br><b>±0.1</b> | <b>350</b><br><b>±6.0</b>                    | <b>4.7</b><br><b>±1.0</b>                                   | <b>0.755</b>                 |
| 0.48                 | 100                  | 57.6                       | 330                                          | 6.7                                                         | 0.657                        |
| 0.48                 | 100                  | 58.1                       | 334                                          | 4.5                                                         | 0.707                        |
| 0.48                 | 100                  | 57.4                       | 327                                          | 4.6                                                         | 0.608                        |
| <b>Average</b>       | <b>100</b>           | <b>57.7</b><br><b>±0.4</b> | <b>330</b><br><b>±4.0</b>                    | <b>5.3</b><br><b>±1.2</b>                                   | <b>0.658</b>                 |
| 0.57                 | 100                  | 59.1                       | 321                                          | 5.4                                                         | 0.964                        |
| 0.57                 | 100                  | 59.2                       | 331                                          | 5.2                                                         | 0.737                        |
| 0.57                 | 100                  | 58.7                       | 328                                          | 5.6                                                         | 0.775                        |
| <b>Average</b>       | <b>100</b>           | <b>59.0</b>                | <b>327</b>                                   | <b>5.4</b>                                                  | <b>0.825</b>                 |

|                      |                      | $\pm 0.3$                                  | $\pm 5.0$                                                      | $\pm 0.2$                                                                      |            |
|----------------------|----------------------|--------------------------------------------|----------------------------------------------------------------|--------------------------------------------------------------------------------|------------|
| Protein <sup>†</sup> | Alcohol <sup>†</sup> | $t_{1/2}/^{\circ}\text{C}$                 | $\Delta H_{\text{cal}}$<br>( $\text{kJ}\cdot\text{mol}^{-1}$ ) | $\Delta C_{\text{P}}$<br>( $\text{kJ}\cdot\text{K}^{-1}\cdot\text{mol}^{-1}$ ) | $\sigma^*$ |
| <b>pH=6.0</b>        |                      |                                            |                                                                |                                                                                |            |
| 0.08                 | 75                   | 47.8                                       | 178                                                            | 5.9                                                                            | 0.591      |
| 0.08                 | 75                   | 47.8                                       | 182                                                            | 3.9                                                                            | 0.829      |
| 0.08                 | 75                   | 47.8                                       | 172                                                            | 4.0                                                                            | 0.662      |
| <b>Average</b>       | <b>75</b>            | <b>47.8</b><br><b><math>\pm 0.0</math></b> | <b>177</b><br><b><math>\pm 5.0</math></b>                      | <b>4.6</b><br><b><math>\pm 1.1</math></b>                                      |            |
| 0.16                 | 75                   | 50.0                                       | 194                                                            | 4.5                                                                            | 0.833      |
| 0.16                 | 75                   | 50.3                                       | 197                                                            | 4.6                                                                            | 0.929      |
| 0.16                 | 75                   | 50.5                                       | 192                                                            | 3.4                                                                            | 0.920      |
| <b>Average</b>       | <b>75</b>            | <b>50.3</b><br><b><math>\pm 0.3</math></b> | <b>194</b><br><b><math>\pm 3.0</math></b>                      | <b>4.2</b><br><b><math>\pm 0.7</math></b>                                      |            |
| 0.24                 | 75                   | 52.7                                       | 205                                                            | 3.9                                                                            | 0.994      |
| 0.24                 | 75                   | 52.4                                       | 208                                                            | 4.3                                                                            | 0.779      |
| 0.24                 | 75                   | 52.8                                       | 213                                                            | 4.1                                                                            | 0.941      |
| <b>Average</b>       | <b>75</b>            | <b>52.6</b><br><b><math>\pm 0.2</math></b> | <b>209</b><br><b><math>\pm 4.0</math></b>                      | <b>4.1</b><br><b><math>\pm 0.2</math></b>                                      |            |
| 0.32                 | 75                   | 54.5                                       | 225                                                            | 6.5                                                                            | 0.665      |
| 0.32                 | 75                   | 54.9                                       | 230                                                            | 7.1                                                                            | 1.220      |
| 0.32                 | 75                   | 54.8                                       | 220                                                            | 4.7                                                                            | 0.949      |
| <b>Average</b>       | <b>75</b>            | <b>54.7</b><br><b><math>\pm 0.2</math></b> | <b>225</b><br><b><math>\pm 5.0</math></b>                      | <b>6.1</b><br><b><math>\pm 1.2</math></b>                                      |            |
| 0.40                 | 75                   | 57.0                                       | 237                                                            | 5.2                                                                            | 0.733      |
| 0.40                 | 75                   | 56.1                                       | 235                                                            | 6.0                                                                            | 0.753      |
| 0.40                 | 75                   | 56.9                                       | 236                                                            | 5.2                                                                            | 0.547      |
| <b>Average</b>       | <b>75</b>            | <b>56.7</b><br><b><math>\pm 0.5</math></b> | <b>236</b><br><b><math>\pm 1.0</math></b>                      | <b>5.5</b><br><b><math>\pm 0.5</math></b>                                      |            |
| 0.48                 | 75                   | 59.0                                       | 252                                                            | 5.0                                                                            | 1.560      |
| 0.48                 | 75                   | 58.2                                       | 251                                                            | 5.1                                                                            | 1.560      |
| 0.48                 | 75                   | 58.2                                       | 241                                                            | 5.1                                                                            | 1.420      |
| <b>Average</b>       | <b>75</b>            | <b>58.5</b><br><b><math>\pm 0.5</math></b> | <b>248</b><br><b><math>\pm 6.0</math></b>                      | <b>5.1</b><br><b><math>\pm 0.1</math></b>                                      |            |

| Protein <sup>†</sup> | Alcohol <sup>†</sup> | t <sub>1/2</sub> /°C | $\Delta H_{\text{cal}}$<br>(kJ.mol <sup>-1</sup> ) | $\Delta C_p$<br>(kJ.K <sup>-1</sup> .mol <sup>-1</sup> ) | $\sigma^*$ |
|----------------------|----------------------|----------------------|----------------------------------------------------|----------------------------------------------------------|------------|
| 0.57                 | 75                   | 59.6                 | 261                                                | 4.6                                                      | 1.390      |
| 0.57                 | 75                   | 59.7                 | 267                                                | 4.1                                                      | 1.350      |
| 0.57                 | 75                   | 60.1                 | 270                                                | 6.1                                                      | 1.390      |
| <b>Average</b>       |                      | <b>59.8</b>          | <b>266</b>                                         | <b>4.9</b>                                               |            |
|                      |                      | <b>±0.3</b>          | <b>±5</b>                                          | <b>±1.0</b>                                              |            |

**Figure Legends (in supplementary information)**

**Figure S1.** A plot of  $\Delta t_{1/2}$  versus alcohol concentration for the thermal denaturation of  $0.32 \times 10^{-3} \text{ mol dm}^{-3}$  cytochrome c in presence of varying concentrations of 4-chlorobutan-1-ol, pH 4.0.

**Figure S2.** A plot of  $\Delta H_{\text{cal}}$  versus alcohol concentration for the thermal denaturation of  $0.32 \times 10^{-3} \text{ mol dm}^{-3}$  cytochrome c in presence of varying concentrations of 4-chlorobutan-1-ol, pH 4.0.

**Figure S3.** A plot of  $t_{1/2}$  versus protein concentration for thermal denaturation of cytochrome c in presence of  $100 \times 10^{-3} \text{ mol dm}^{-3}$  4-chlorobutan-1-ol, pH 4.0.

**Figure S4.** A plot of  $\Delta H_{\text{cal}}$  versus protein concentration for thermal denaturation of cytochrome c in presence of  $100 \times 10^{-3} \text{ mol dm}^{-3}$  4-chlorobutan-1-ol at pH 4.0.

**Figure S5.** Fluorescence emission spectra of  $16 \times 10^{-6} \text{ mol dm}^{-3}$  cytochrome c at pH 4.0 in (B) buffer; and in the presence of varying concentrations of 4-chlorobutan-1-ol: (C) 25 ; (D) 50 ; (E) 50 at 69.0 °C; (F) 50 at 83.0 °C; (G) 100 ; (H) 100 at 70.0 °C; (I) 200 ; and (J)  $225 \times 10^{-3} \text{ mol dm}^{-3}$ .

**Figure S6.** Stern-Volmer plot for quenching of the intrinsic fluorescence of  $24 \times 10^{-6} \text{ mol dm}^{-3}$  cytochrome c in presence of (■)  $50 \times 10^{-3} \text{ mol dm}^{-3}$  4-chlorobutan-1-ol at 69.0 °C; (●)  $50 \times 10^{-3} \text{ mol dm}^{-3}$  4-chlorobutan-1-ol at 83.0 °C; and (▲)  $200 \times 10^{-3} \text{ mol dm}^{-3}$  4-chlorobutan-1-ol by varying concentrations of acrylamide ( $0 - 0.45 \text{ mol dm}^{-3}$ ) at pH 4.0.

**Figure S7.** A plot of  $\ln(v/T_m^2)$  versus  $1/T_m$  for thermal denaturation of  $0.32 \times 10^{-3} \text{ mol dm}^{-3}$  cytochrome c in presence of  $75 \times 10^{-3} \text{ mol dm}^{-3}$  4-chlorobutan-1-ol at pH 6.0.

**Figure S8.** Near-UV CD spectra of  $24 \times 10^{-6} \text{ mol dm}^{-3}$  cytochrome c at pH 6.0 in (A) buffer; and in presence of varying concentrations of 4-chlorobutan-1-ol: (D) 50 and (F)  $100 \times 10^{-3} \text{ mol dm}^{-3}$ .

**Figure S9.** Far-UV CD spectra of  $8 \times 10^{-3} \text{ mol dm}^{-3}$  cytochrome c at pH 6.0 in (A) buffer; and in the presence of varying concentrations of 4-chlorobutan-1-ol: (D) 50 ; and (F)  $100 \times 10^{-3} \text{ mol dm}^{-3}$ .

**Figure S10.** Near-UV CD spectra of  $24 \times 10^{-6} \text{ mol dm}^{-3}$  cytochrome c at pH 7.0 in (A) buffer; and in the presence of varying concentrations of 4-chlorobutan-1-ol: (B) 50; and (F)  $125 \times 10^{-3} \text{ mol dm}^{-3}$ .

**Figure S11.** Far-UV CD spectra of  $8 \times 10^{-6} \text{ mol dm}^{-3}$  cytochrome c at pH 7.0 in (A) buffer; and in the presence of varying concentrations of 4-chlorobutan-1-ol: (D) 50 ; and (F)  $125 \times 10^{-3} \text{ mol dm}^{-3}$ .

**Figure S12.** Fluorescence emission spectra of  $16 \times 10^{-6} \text{ mol dm}^{-3}$  cytochrome c at pH 7.0 in (B) buffer; and in the presence of varying concentrations of 4-chlorobutan-1-ol: (C) 25 ; (D) 100 ; (E) 100 at  $70.0^\circ\text{C}$ ; (F) 150 ; and (G)  $175 \times 10^{-3} \text{ mol dm}^{-3}$ .

**Figure S13.** Fluorescence emission spectra obtained from ANS ( $11.6 \times 10^{-5} \text{ mol dm}^{-3}$ ) binding studies of  $16 \times 10^{-6} \text{ mol dm}^{-3}$  cytochrome c at pH 7.0 in (B) buffer; and in the presence of varying concentrations of 4-chlorobutan-1-ol: (C) 25 ; (D) 100 ; (E) 100 at  $70.0^\circ\text{C}$ ; (F) 150 ; and (G)  $175 \times 10^{-3} \text{ mol dm}^{-3}$ .

**Figure S14.** Fluorescence emission spectra obtained from energy transfer between  $16 \times 10^{-6} \text{ mol dm}^{-3}$  cytochrome c and ANS ( $11.6 \times 10^{-5} \text{ mol dm}^{-3}$ ) at pH 7.0 in (B) buffer; and in the presence of varying concentrations of 4-chlorobutan-1-ol: (C) 25 ; (D) 100 ; (E) 100 at  $70.0^\circ\text{C}$ ; (F) 150 ; and (G)  $175 \times 10^{-3} \text{ mol dm}^{-3}$ .

**Figure S15.** Stern-Volmer plot for quenching of the intrinsic fluorescence of  $24 \times 10^{-6}$  mol dm<sup>-3</sup> cytochrome c in presence of (■)  $150 \times 10^{-3}$  mol dm<sup>-3</sup> 4-chlorobutan-1-ol; (●)  $100 \times 10^{-3}$  mol dm<sup>-3</sup> 4-chlorobutan-1-ol at 70.0 °C by varying concentrations of acrylamide (0 – 0.45 mol dm<sup>-3</sup>) at pH 7.0.
